# Supplementary material
Source: publisher site journal article supplement (https://www.spandidos-publications.com/4926/downloadSupplementary)

Figure S1. N.Oc. Dots indicate the relative N.Oc, and bars indicate the mean  $\pm$  SD. Statistical significance was analyzed by one-way ANOVA with post-hoc Tukey's honest significance test. \* $P < 0.05$ . Hyp mice, X-linked hypophosphatemic mice; N.Oc, number of osteoclasts.

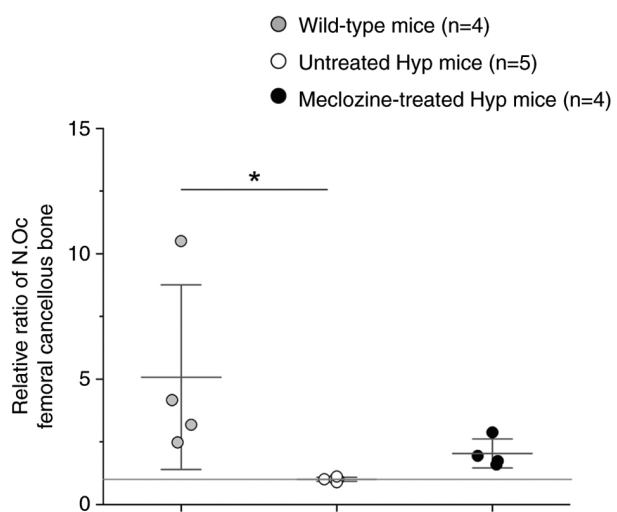

Supplement: Supplementary file 1 [file downloadSupplementary]
